# Supplementary material
Source: ML conference proceedings conference paper supplement (https://openreview.net/forum?id=U17KoLrXE8)
Supplement: supplementary_material [file attachment]

ObjectNet Captions HUMANr Examples

Below are examples of captions created by humans and models for ObjectNet images, along with their corresponding HUMANr scores. The first column contains human-generated captions and the second column contains captions from either machine models or a second human. The HUMANr score in the third column indicates which caption best matched the image, as determined by another human rater. A score of -1 favors the first caption, a score of 1 favors the second caption, and a score of 0 indicates a tie. Green highlights the preferred captions, and grey indicates the less preferred caption. Both captions are green if equally preferred.

|                                                                                    |                           |                                                                                                                                                                                                                                                                                                                                                              |                                                                                                                                                                                                                     |              |
|------------------------------------------------------------------------------------|---------------------------|--------------------------------------------------------------------------------------------------------------------------------------------------------------------------------------------------------------------------------------------------------------------------------------------------------------------------------------------------------------|---------------------------------------------------------------------------------------------------------------------------------------------------------------------------------------------------------------------|--------------|
| 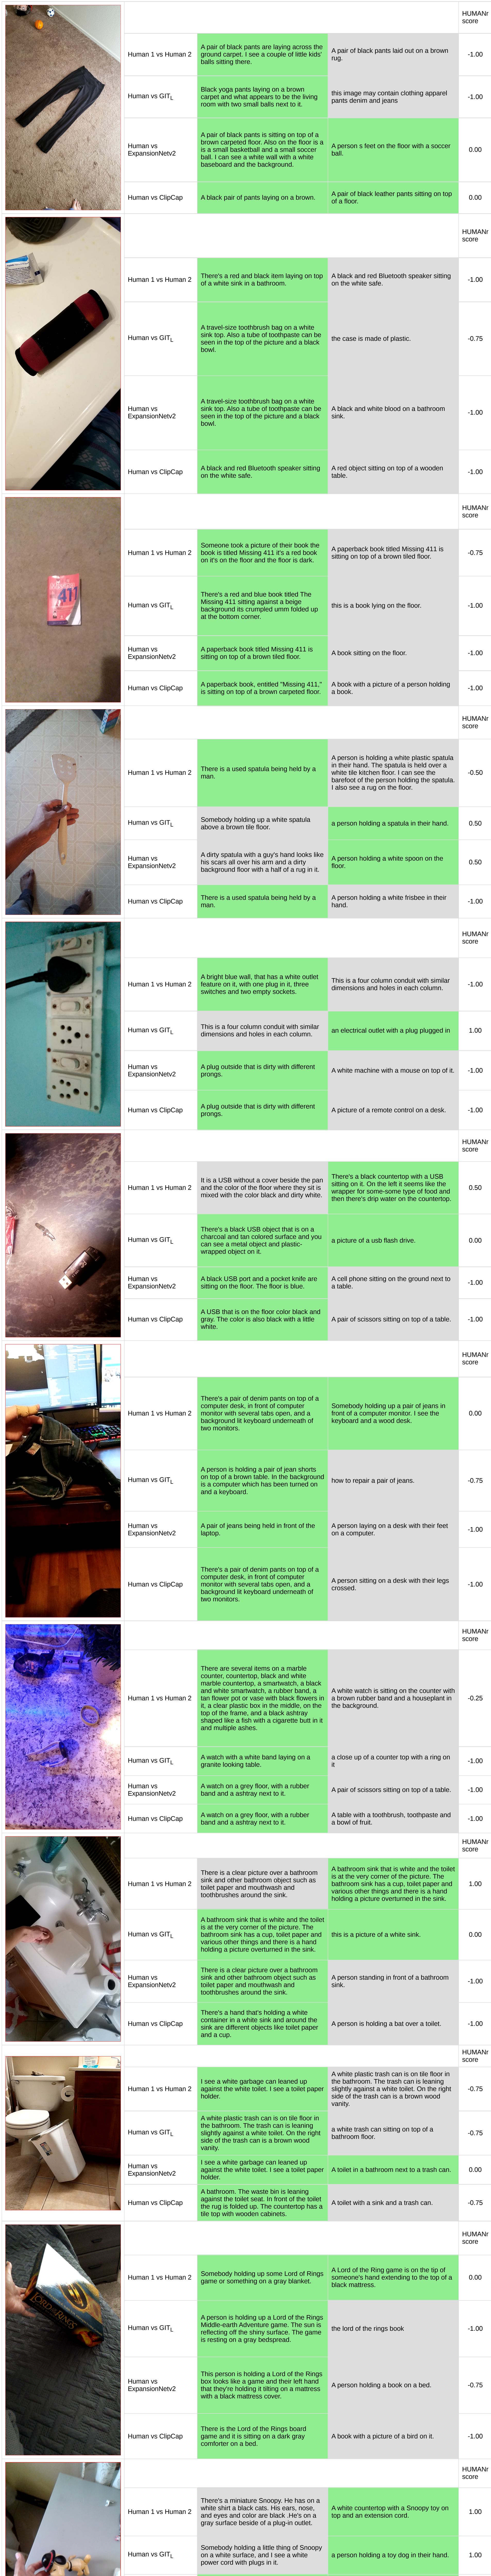   |                           |                                                                                                                                                                                                                                                                                                                                                              |                                                                                                                                                                                                                     | HUMANr score |
|                                                                                    | Human 1 vs Human 2        | A pair of black pants are laying across the ground carpet. I see a couple of little kids' balls sitting there.                                                                                                                                                                                                                                               | A pair of black pants laid out on a brown rug.                                                                                                                                                                      | -1.00        |
|                                                                                    | Human vs GIT <sub>L</sub> | Black yoga pants laying on a brown carpet and what appears to be the living room with two small balls next to it.                                                                                                                                                                                                                                            | this image may contain clothing apparel pants denim and jeans                                                                                                                                                       | -1.00        |
|                                                                                    | Human vs ExpansionNetv2   | A pair of black pants is sitting on top of a brown carpeted floor. Also on the floor is a small basketball and a small soccer ball. I can see a white wall with a white baseboard and the background.                                                                                                                                                        | A person s feet on the floor with a soccer ball.                                                                                                                                                                    | 0.00         |
|                                                                                    | Human vs ClipCap          | A black pair of pants laying on a brown.                                                                                                                                                                                                                                                                                                                     | A pair of black leather pants sitting on top of a floor.                                                                                                                                                            | 0.00         |
|   |                           |                                                                                                                                                                                                                                                                                                                                                              |                                                                                                                                                                                                                     | HUMANr score |
|                                                                                    | Human 1 vs Human 2        | There's a red and black item laying on top of a white sink in a bathroom.                                                                                                                                                                                                                                                                                    | A black and red Bluetooth speaker sitting on the white safe.                                                                                                                                                        | -1.00        |
|                                                                                    | Human vs GIT <sub>L</sub> | A travel-size toothbrush bag on a white sink top. Also a tube of toothpaste can be seen in the top of the picture and a black bowl.                                                                                                                                                                                                                          | the case is made of plastic.                                                                                                                                                                                        | -0.75        |
|                                                                                    | Human vs ExpansionNetv2   | A travel-size toothbrush bag on a white sink top. Also a tube of toothpaste can be seen in the top of the picture and a black bowl.                                                                                                                                                                                                                          | A black and white blood on a bathroom sink.                                                                                                                                                                         | -1.00        |
|                                                                                    | Human vs ClipCap          | A black and red Bluetooth speaker sitting on the white safe.                                                                                                                                                                                                                                                                                                 | A red object sitting on top of a wooden table.                                                                                                                                                                      | -1.00        |
|  |                           |                                                                                                                                                                                                                                                                                                                                                              |                                                                                                                                                                                                                     | HUMANr score |
|                                                                                    | Human 1 vs Human 2        | Someone took a picture of their book the book is titled Missing 411 it's a red book on it's on the floor and the floor is dark.                                                                                                                                                                                                                              | A paperback book titled Missing 411 is sitting on top of a brown tiled floor.                                                                                                                                       | -0.75        |
|                                                                                    | Human vs GIT <sub>L</sub> | There's a red and blue book titled The Missing 411 sitting against a beige background its crumpled umm folded up at the bottom corner.                                                                                                                                                                                                                       | this is a book lying on the floor.                                                                                                                                                                                  | -1.00        |
|                                                                                    | Human vs ExpansionNetv2   | A paperback book titled Missing 411 is sitting on top of a brown tiled floor.                                                                                                                                                                                                                                                                                | A book sitting on the floor.                                                                                                                                                                                        | -1.00        |
|                                                                                    | Human vs ClipCap          | A paperback book, entitled "Missing 411," is sitting on top of a brown carpeted floor.                                                                                                                                                                                                                                                                       | A book with a picture of a person holding a book.                                                                                                                                                                   | -1.00        |
|  |                           |                                                                                                                                                                                                                                                                                                                                                              |                                                                                                                                                                                                                     | HUMANr score |
|                                                                                    | Human 1 vs Human 2        | There is a used spatula being held by a man.                                                                                                                                                                                                                                                                                                                 | A person is holding a white plastic spatula in their hand. The spatula is held over a white tile kitchen floor. I can see the barefoot of the person holding the spatula. I also see a rug on the floor.            | -0.50        |
|                                                                                    | Human vs GIT <sub>L</sub> | Somebody holding up a white spatula above a brown tile floor.                                                                                                                                                                                                                                                                                                | a person holding a spatula in their hand.                                                                                                                                                                           | 0.50         |
|                                                                                    | Human vs ExpansionNetv2   | A dirty spatula with a guy's hand looks like his scars all over his arm and a dirty background floor with a half of a rug in it.                                                                                                                                                                                                                             | A person holding a white spoon on the floor.                                                                                                                                                                        | 0.50         |
|                                                                                    | Human vs ClipCap          | There is a used spatula being held by a man.                                                                                                                                                                                                                                                                                                                 | A person holding a white frisbee in their hand.                                                                                                                                                                     | -1.00        |
|  |                           |                                                                                                                                                                                                                                                                                                                                                              |                                                                                                                                                                                                                     | HUMANr score |
|                                                                                    | Human 1 vs Human 2        | A bright blue wall, that has a white outlet feature on it, with one plug in it, three switches and two empty sockets.                                                                                                                                                                                                                                        | This is a four column conduit with similar dimensions and holes in each column.                                                                                                                                     | -1.00        |
|                                                                                    | Human vs GIT <sub>L</sub> | This is a four column conduit with similar dimensions and holes in each column.                                                                                                                                                                                                                                                                              | an electrical outlet with a plug plugged in                                                                                                                                                                         | 1.00         |
|                                                                                    | Human vs ExpansionNetv2   | A plug outside that is dirty with different prongs.                                                                                                                                                                                                                                                                                                          | A white machine with a mouse on top of it.                                                                                                                                                                          | -1.00        |
|                                                                                    | Human vs ClipCap          | A plug outside that is dirty with different prongs.                                                                                                                                                                                                                                                                                                          | A picture of a remote control on a desk.                                                                                                                                                                            | -1.00        |
|  |                           |                                                                                                                                                                                                                                                                                                                                                              |                                                                                                                                                                                                                     | HUMANr score |
|                                                                                    | Human 1 vs Human 2        | It is a USB without a cover beside the pan and the color of the floor where they sit is mixed with the color black and dirty white.                                                                                                                                                                                                                          | There's a black countertop with a USB sitting on it. On the left it seems like the wrapper for some-some type of food and then there's drip water on the countertop.                                                | 0.50         |
|                                                                                    | Human vs GIT <sub>L</sub> | There's a black USB object that is on a charcoal and tan colored surface and you can see a metal object and plastic-wrapped object on it.                                                                                                                                                                                                                    | a picture of a usb flash drive.                                                                                                                                                                                     | 0.00         |
|                                                                                    | Human vs ExpansionNetv2   | A black USB port and a pocket knife are sitting on the floor. The floor is blue.                                                                                                                                                                                                                                                                             | A cell phone sitting on the ground next to a table.                                                                                                                                                                 | -1.00        |
|                                                                                    | Human vs ClipCap          | A USB that is on the floor color black and gray. The color is also black with a little white.                                                                                                                                                                                                                                                                | A pair of scissors sitting on top of a table.                                                                                                                                                                       | -1.00        |
|  |                           |                                                                                                                                                                                                                                                                                                                                                              |                                                                                                                                                                                                                     | HUMANr score |
|                                                                                    | Human 1 vs Human 2        | There's a pair of denim pants on top of a computer desk, in front of computer monitor with several tabs open, and a background lit keyboard underneath of two monitors.                                                                                                                                                                                      | Somebody holding up a pair of jeans in front of a computer monitor. I see the keyboard and a wood desk.                                                                                                             | 0.00         |
|                                                                                    | Human vs GIT <sub>L</sub> | A person is holding a pair of jean shorts on top of a brown table. In the background is a computer which has been turned on and a keyboard.                                                                                                                                                                                                                  | how to repair a pair of jeans.                                                                                                                                                                                      | -0.75        |
|                                                                                    | Human vs ExpansionNetv2   | A pair of jeans being held in front of the laptop.                                                                                                                                                                                                                                                                                                           | A person laying on a desk with their feet on a computer.                                                                                                                                                            | -1.00        |
|                                                                                    | Human vs ClipCap          | There's a pair of denim pants on top of a computer desk, in front of computer monitor with several tabs open, and a background lit keyboard underneath of two monitors.                                                                                                                                                                                      | A person sitting on a desk with their legs crossed.                                                                                                                                                                 | -1.00        |
|  |                           |                                                                                                                                                                                                                                                                                                                                                              |                                                                                                                                                                                                                     | HUMANr score |
|                                                                                    | Human 1 vs Human 2        | There are several items on a marble counter, countertop, black and white marble countertop, a smartwatch, a black and white smartwatch, a rubber band, a tan flower pot or vase with black flowers in it, a clear plastic box in the middle, on the top of the frame, and a black ashtray shaped like a fish with a cigarette butt in it and multiple ashes. | A white watch is sitting on the counter with a brown rubber band and a houseplant in the background.                                                                                                                | -0.25        |
|                                                                                    | Human vs GIT <sub>L</sub> | A watch with a white band laying on a granite looking table.                                                                                                                                                                                                                                                                                                 | a close up of a counter top with a ring on it                                                                                                                                                                       | -1.00        |
|                                                                                    | Human vs ExpansionNetv2   | A watch on a grey floor, with a rubber band and a ashtray next to it.                                                                                                                                                                                                                                                                                        | A pair of scissors sitting on top of a table.                                                                                                                                                                       | -1.00        |
|                                                                                    | Human vs ClipCap          | A watch on a grey floor, with a rubber band and a ashtray next to it.                                                                                                                                                                                                                                                                                        | A table with a toothbrush, toothpaste and a bowl of fruit.                                                                                                                                                          | -1.00        |
|  |                           |                                                                                                                                                                                                                                                                                                                                                              |                                                                                                                                                                                                                     | HUMANr score |
|                                                                                    | Human 1 vs Human 2        | There is a clear picture over a bathroom sink and other bathroom object such as toilet paper and mouthwash and toothbrushes around the sink.                                                                                                                                                                                                                 | A bathroom sink that is white and the toilet is at the very corner of the picture. The bathroom sink has a cup, toilet paper and various other things and there is a hand holding a picture overturned in the sink. | 1.00         |
|                                                                                    | Human vs GIT <sub>L</sub> | A bathroom sink that is white and the toilet is at the very corner of the picture. The bathroom sink has a cup, toilet paper and various other things and there is a hand holding a picture overturned in the sink.                                                                                                                                          | this is a picture of a white sink.                                                                                                                                                                                  | 0.00         |
|                                                                                    | Human vs ExpansionNetv2   | There is a clear picture over a bathroom sink and other bathroom object such as toilet paper and mouthwash and toothbrushes around the sink.                                                                                                                                                                                                                 | A person standing in front of a bathroom sink.                                                                                                                                                                      | -1.00        |
|                                                                                    | Human vs ClipCap          | There's a hand that's holding a white container in a white sink and around the sink are different objects like toilet paper and a cup.                                                                                                                                                                                                                       | A person is holding a bat over a toilet.                                                                                                                                                                            | -1.00        |
|  |                           |                                                                                                                                                                                                                                                                                                                                                              |                                                                                                                                                                                                                     | HUMANr score |
|                                                                                    | Human 1 vs Human 2        | I see a white garbage can leaned up against the white toilet. I see a toilet paper holder.                                                                                                                                                                                                                                                                   | A white plastic trash can is on tile floor in the bathroom. The trash can is leaning slightly against a white toilet. On the right side of the trash can is a brown wood vanity.                                    | -0.75        |
|                                                                                    | Human vs GIT <sub>L</sub> | A white plastic trash can is on tile floor in the bathroom. The trash can is leaning slightly against a white toilet. On the right side of the trash can is a brown wood vanity.                                                                                                                                                                             | a white trash can sitting on top of a bathroom floor.                                                                                                                                                               | -0.75        |
|                                                                                    | Human vs ExpansionNetv2   | I see a white garbage can leaned up against the white toilet. I see a toilet paper holder.                                                                                                                                                                                                                                                                   | A toilet in a bathroom next to a trash can.                                                                                                                                                                         | 0.00         |
|                                                                                    | Human vs ClipCap          | A bathroom. The waste bin is leaning against the toilet seat. In front of the toilet the rug is folded up. The countertop has a tile top with wooden cabinets.                                                                                                                                                                                               | A toilet with a sink and a trash can.                                                                                                                                                                               | -0.75        |
|  |                           |                                                                                                                                                                                                                                                                                                                                                              |                                                                                                                                                                                                                     | HUMANr score |
|                                                                                    | Human 1 vs Human 2        | Somebody holding up some Lord of Rings game or something on a gray blanket.                                                                                                                                                                                                                                                                                  | A Lord of the Ring game is on the tip of someone's hand extending to the top of a black mattress.                                                                                                                   | 0.00         |
|                                                                                    | Human vs GIT <sub>L</sub> | A person is holding up a Lord of the Rings Middle-earth Adventure game. The sun is reflecting off the shiny surface. The game is resting on a gray bedspread.                                                                                                                                                                                                | the lord of the rings book                                                                                                                                                                                          | -1.00        |
|                                                                                    | Human vs ExpansionNetv2   | This person is holding a Lord of the Rings box looks like a game and their left hand that they're holding it tilting on a mattress with a black mattress cover.                                                                                                                                                                                              | A person holding a book on a bed.                                                                                                                                                                                   | -0.75        |
|                                                                                    | Human vs ClipCap          | There is the Lord of the Rings board game and it is sitting on a dark gray comforter on a bed.                                                                                                                                                                                                                                                               | A book with a picture of a bird on it.                                                                                                                                                                              | -1.00        |
|  |                           |                                                                                                                                                                                                                                                                                                                                                              |                                                                                                                                                                                                                     | HUMANr score |
|                                                                                    | Human 1 vs Human 2        | There's a miniature Snoopy. He has on a white shirt a black cats. His ears, nose, and eyes and color are black .He's on a gray surface beside of a plug-in outlet.                                                                                                                                                                                           | A white countertop with a Snoopy toy on top and an extension cord.                                                                                                                                                  | 1.00         |
|                                                                                    | Human vs GIT <sub>L</sub> | Somebody holding a little thing of Snoopy on a white surface, and I see a white power cord with plugs in it.                                                                                                                                                                                                                                                 | a person holding a toy dog in their hand.                                                                                                                                                                           | 1.00         |
|                                                                                    | Human vs ExpansionNetv2   | A person is holding a ceramic Snoopy. The Snoopy is sitting on top of a table, or a countertop. I can also see a, an extension cord that is white and a wall in the background.                                                                                                                                                                              | A person holding a toy is next to a laptop.                                                                                                                                                                         | 0.00         |
|                                                                                    | Human vs ClipCap          | Somebody holding a little thing of Snoopy on a white surface, and I see a white power cord with plugs in it.                                                                                                                                                                                                                                                 | A person holding a toy mouse next to a keyboard.                                                                                                                                                                    | -1.00        |
